# Supplementary material
Source: PubMed Central journal article supplement (PMC4390479)
Supplement: NIHMS658807-supplement-Supp_data.pdf [file NIHMS658807-supplement-Supp_data.pdf]

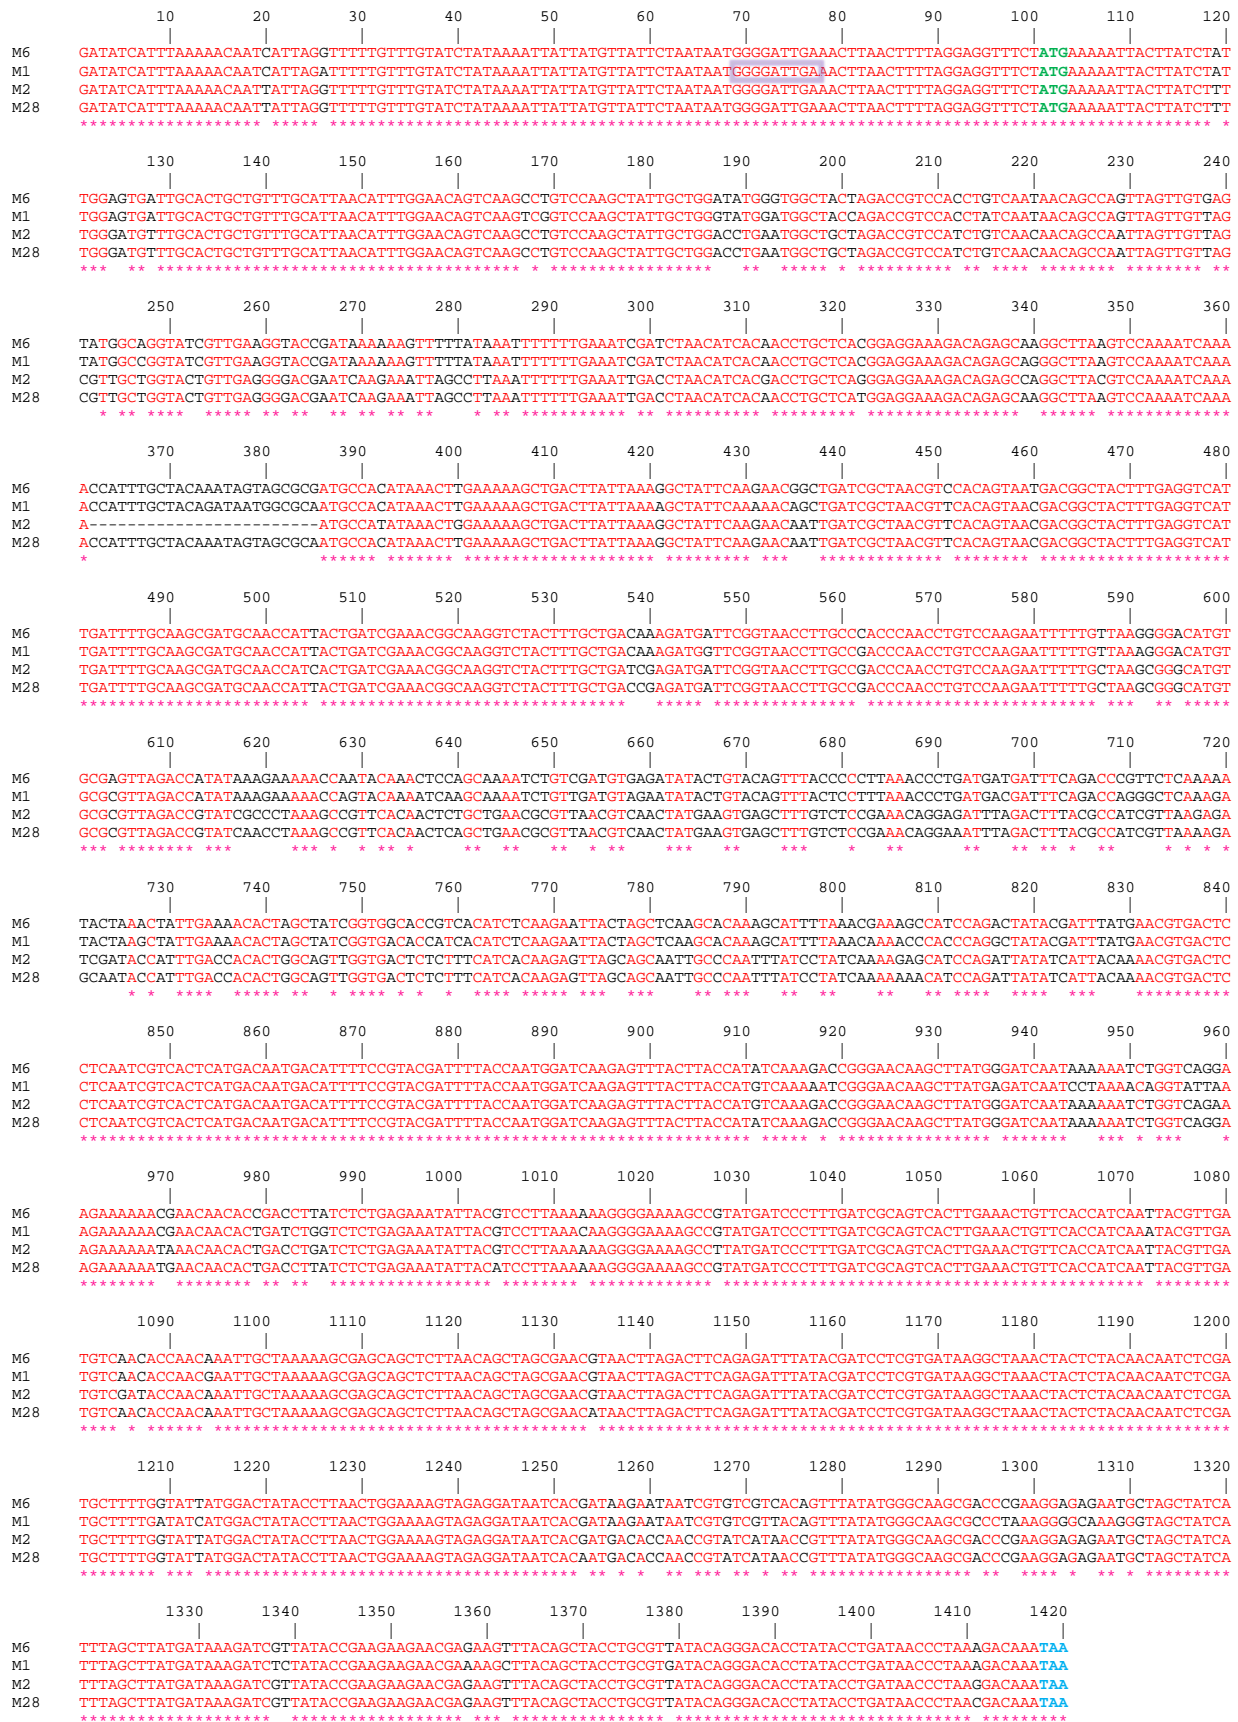

**Figure S1**  
**Alignment of the *ska* genes from the serotype M1, M2, M6, and M28 strains used in this study.**  
 The *ska* genes, and 100 nucleotides upstream of the ATG start codon, were aligned. Nucleotides that are identical across all four *ska* alleles are colored red. The start codon is colored green. The stop codon is colored blue. The nine nucleotides that base-pair to the Fas sRNA in serotype M1 GAS are highlighted in a purple box.

| Strain Name        | Information                                                                                                                                                                    | Reference                         |
|--------------------|--------------------------------------------------------------------------------------------------------------------------------------------------------------------------------|-----------------------------------|
| MGAS2221           | Serotype M1 clinical GAS isolate that has been genome sequenced                                                                                                                | Sumby <i>et al.</i> , 2006        |
| 2221ΔFasX          | MGAS2221 derivative in which the <i>fasX</i> gene has been replaced with a spectinomycin resistance cassette                                                                   | Ramirez-Pena <i>et al.</i> , 2010 |
| 2221ΔFasX + vector | 2221ΔFasX containing the empty shuttle vector pDCBB                                                                                                                            | Ramirez-Pena <i>et al.</i> , 2010 |
| 2221ΔFasX + pFasX  | 2221ΔFasX containing the pDCBB-derivative pFasX which contains a wild-type <i>fasX</i> allele downstream of the natural promoter                                               | Ramirez-Pena <i>et al.</i> , 2010 |
| MGAS10270          | Serotype M2 clinical GAS isolate that has been genome sequenced                                                                                                                | Beres <i>et al.</i> , 2007        |
| M2 + vector        | MGAS10270 containing the empty shuttle vector pDCBB                                                                                                                            | This work                         |
| M2 + pFasX         | MGAS10270 containing the pDCBB-derivative pFasX which contains a wild-type <i>fasX</i> allele downstream of the natural promoter                                               | This work                         |
| M2ΔFasX            | MGAS10270 derivative in which the <i>fasX</i> gene has been replaced with a spectinomycin resistance cassette                                                                  | This work                         |
| M2ΔFasX + vector   | M2ΔFasX containing the empty shuttle vector pDCBB                                                                                                                              | This work                         |
| M2ΔFasX + pFasX    | M2ΔFasX containing the pDCBB-derivative pFasX which contains a wild-type <i>fasX</i> allele downstream of the natural promoter                                                 | This work                         |
| M2ΔPIL             | MGAS10270 derivative in which the pilus operon genes <i>10270_spy0109</i> to <i>0111</i> have been partially or fully deleted and a spectinomycin resistance cassette inserted | This work                         |
| MGAS10394          | Serotype M6 clinical GAS isolate that has been genome sequenced                                                                                                                | Banks <i>et al.</i> , 2004        |
| M6ΔFasX            | MGAS10394 derivative in which the <i>fasX</i> gene has been replaced with a spectinomycin resistance cassette                                                                  | This work                         |
| M6ΔFasX + vector   | M6ΔFasX containing the empty shuttle vector pDCBB                                                                                                                              | This work                         |
| M6ΔFasX + pFasX    | M6ΔFasX containing the pDCBB-derivative pFasX which contains a wild-type <i>fasX</i> allele downstream of the natural promoter                                                 | This work                         |
| MGAS6180           | Serotype M28 clinical GAS isolate that has been genome sequenced                                                                                                               | Green <i>et al.</i> , 2005        |
| M28ΔFasX           | MGAS6180 derivative in which the <i>fasX</i> gene has been replaced with a spectinomycin resistance cassette                                                                   | This work                         |
| M28ΔFasX + vector  | M28ΔFasX containing the empty shuttle vector pDCBB                                                                                                                             | This work                         |
| M28ΔFasX + pFasX   | M28ΔFasX containing the pDCBB-derivative pFasX which contains a wild-type <i>fasX</i> allele downstream of the natural promoter                                                | This work                         |

Table S1  
Table of GAS strains used in this study.

| Primer name  | Sequence (5' - 3')                                                        | Role                                                                                                                                                                                           |
|--------------|---------------------------------------------------------------------------|------------------------------------------------------------------------------------------------------------------------------------------------------------------------------------------------|
| M2PILA       | gtcagatccAAATGTATGCCGCTTCCACGATAAAGCC                                     | Used in construction of pilus operon mutant in M2 GAS                                                                                                                                          |
| M2PILB       | CTAAGAAAATGAGACGGAAAATCCAGCTGAATACAACTCTTTG                               | Used in construction of pilus operon mutant in M2 GAS                                                                                                                                          |
| M2PILC       | CAAAGAAGTGTGTATTCAGCTGGATTTCCGCTCATTTCTTAG                                | Used in construction of pilus operon mutant in M2 GAS                                                                                                                                          |
| M2PILD       | gcagatccAAGGTAATAACTACCTGGCTTAC                                           | Used in construction of pilus operon mutant in M2 GAS                                                                                                                                          |
| M2PILE       | GGTGATATAAATTAATAGAGGTAG                                                  | Used in construction of pilus operon mutant in M2 GAS                                                                                                                                          |
| M2PILF       | TACTCTCAATCCTCTTTTTGGCTTAC                                                | Used in construction of pilus operon mutant in M2 GAS                                                                                                                                          |
| FASXA        | TCGTGGATATAGCCAAACG                                                       | Used in construction of <i>fasX</i> mutant in M2 GAS                                                                                                                                           |
| M2FASXB      | gttattgattattataacatgattCATTAAATTTATTATAGCGAAAAAATCTTC                    | Used in construction of <i>fasX</i> mutant in M2 GAS                                                                                                                                           |
| FASXC        | ctatttaataaacgattaaaaaattatagGGGTTTTTGATAGGTAATAATC                       | Used in construction of <i>fasX</i> mutant in M2 GAS                                                                                                                                           |
| M2FASXD      | ATCTGAATTAAGAGGGGTAGAGG                                                   | Used in construction of <i>fasX</i> mutant in M2 GAS                                                                                                                                           |
| M2FASXF      | GAAGTATTTTCGCTATAAATAAATAAATGaatcatgattatataactataac                      | Used in construction of <i>fasX</i> mutant in M2 GAS                                                                                                                                           |
| FASXSR       | gtattaccatcaaaaaaacccCTATAAATTTTAACTCTGTTATTTAAATAG                       | Used in construction of <i>fasX</i> mutant in M2 GAS                                                                                                                                           |
| FASXE        | GAGCACCCCAAGGGCACTAGACG                                                   | Used in construction of <i>fasX</i> mutant in M2 GAS                                                                                                                                           |
| M2FASXF      | AAGTGGACAAAGAACTGAAGAC                                                    | Used in construction of <i>fasX</i> mutant in M2 GAS                                                                                                                                           |
| M6fasXD      | CGAATCATACTGGCATTTTGAATTAAG                                               | Used to replace primer M2FASXD in construction of the M6 <i>fasX</i> mutant                                                                                                                    |
| M28fasXM     | TTAACAAGGCAATGAGCATGAG                                                    | Used with FASXA to amplify the SPEC cassette from strain 2221Δ <i>fasX</i> for creation of M28 <i>fasX</i> mutant                                                                              |
| 107TMF       | AAAAGGGAGTCAGAAAAGTAATCTTGGT                                              | Taqman primer for <i>M1.cpa</i>                                                                                                                                                                |
| 107TMR       | CCGGAACCTGTGTTGGCATT                                                      | Taqman primer for <i>M1.cpa</i>                                                                                                                                                                |
| 107TMP       | CGTCAAGCTTTGAAGCACTGATTGATCC                                              | Taqman probe for <i>M1.cpa</i>                                                                                                                                                                 |
| 109TMF       | ACTACTGTCAAGCAAGACGGAAATAAG                                               | Taqman primer for <i>M1.tee1</i>                                                                                                                                                               |
| 109TMR       | CGTATTGTATCCACCTTATCTGAATT                                                | Taqman primer for <i>M1.tee1</i>                                                                                                                                                               |
| 109TMP       | TGACTTTAGTCACTGGTGTGTTCAAGCTACACC                                         | Taqman probe for <i>M1.tee1</i>                                                                                                                                                                |
| 111TMF       | AAACCGAAAAATCGGAGCTTATT                                                   | Taqman primer for <i>M1.111</i>                                                                                                                                                                |
| 111TMR       | CGTAACCTACCATTTACACAGTTG                                                  | Taqman primer for <i>M1.111</i>                                                                                                                                                                |
| 111TMP       | AAACACCGGAACCTCATCAACCAGATACAA                                            | Taqman probe for <i>M1.111</i>                                                                                                                                                                 |
| M2.109 TMF   | CGGTAGCGGACCAACTG                                                         | Taqman primer for <i>M2.fcaA</i>                                                                                                                                                               |
| M2.109 TMR   | TCTGGTGTCTCAGCTCT-TACAAC                                                  | Taqman primer for <i>M2.fcaA</i>                                                                                                                                                               |
| M2.109 TMP   | TAGCCCAAGTGTGACAGTTTGGCAGAA                                               | Taqman probe for <i>M2.fcaA</i>                                                                                                                                                                |
| M2.110 TMF   | GAAGGGACTCCAACCTGAAGG                                                     | Taqman primer for <i>M2.110</i>                                                                                                                                                                |
| M2.110 TMR   | AATTCCAATGTGCCAACA                                                        | Taqman primer for <i>M2.110</i>                                                                                                                                                                |
| M2.110 TMP   | CGCCATCTCAGTTGATTTCAATGG                                                  | Taqman probe for <i>M2.110</i>                                                                                                                                                                 |
| M2.113 TMF   | TAGGCAAGCTACTTTTG-TGTGAA                                                  | Taqman primer for <i>M2.113</i>                                                                                                                                                                |
| M2.113 TMR   | TCCGGTTTTATGTTTTTC-AAAG                                                   | Taqman primer for <i>M2.113</i>                                                                                                                                                                |
| M2.113 TMP   | TCTACTGTCTCGACTTATTTCTGACTTATCATGGTCA                                     | Taqman probe for <i>M2.113</i>                                                                                                                                                                 |
| M6.159 TMF   | GGAGCAGCCCGCACTAA                                                         | Taqman primer for <i>M6.fexX</i>                                                                                                                                                               |
| M6.159 TMR   | CCGCTTATGGTGTCTCAA-TT                                                     | Taqman primer for <i>M6.fexX</i>                                                                                                                                                               |
| M6.159 TMP   | CCAGCTTCTTTTCGGTCTCTTAACCTCCA                                             | Taqman probe for <i>M6.fexX</i>                                                                                                                                                                |
| M6.160 TMF   | CGAATGACGGTTCAGGTA-CAGTATTATTAG                                           | Taqman primer for <i>M6.tee6</i>                                                                                                                                                               |
| M6.160 TMR   | GCTACTCTGTCGAAGGTA-AA-TTCACCTA                                            | Taqman primer for <i>M6.tee6</i>                                                                                                                                                               |
| M6.160 TMP   | ACTGACATCCCTAACCCAA                                                       | Taqman probe for <i>M6.tee6</i>                                                                                                                                                                |
| M6.srB TMF   | AAGAAGCCCTCAGAAATGGA                                                      | Taqman primer for <i>M6.srB</i>                                                                                                                                                                |
| M6.srB TMR   | TGAATGCCATCCCTAAATGA                                                      | Taqman primer for <i>M6.srB</i>                                                                                                                                                                |
| M6.srB TMP   | TTGGGATTCAGCCGGTTCCA                                                      | Taqman probe for <i>M6.srB</i>                                                                                                                                                                 |
| M28.cpa TMF  | TTGGGACAGAATACCATCCA                                                      | Taqman primer for <i>M28.cpa</i>                                                                                                                                                               |
| M28.cpa TMR  | TCCCAACTCACCAGTACTG                                                       | Taqman primer for <i>M28.cpa</i>                                                                                                                                                               |
| M28.cpa TMP  | TCCATACGAATCAGGTCAACCATACTA                                               | Taqman probe for <i>M28.cpa</i>                                                                                                                                                                |
| M28.lepA TMF | TTGAAAGTTGGTCAATTTGC                                                      | Taqman primer for <i>M28.lepA</i>                                                                                                                                                              |
| M28.lepA TMR | AACAGTCTCTCTCTGCGT                                                        | Taqman primer for <i>M28.lepA</i>                                                                                                                                                              |
| M28.lepA TMP | CCTCATCGCAGCTTGAGGG                                                       | Taqman probe for <i>M28.lepA</i>                                                                                                                                                               |
| M28.109 TMF  | AATAACCGTACACTCAA-GTTCFA                                                  | Taqman primer for <i>M28.fcaA</i>                                                                                                                                                              |
| M28.109 TMR  | AGCCACAATGTAAAGAACTGCAA                                                   | Taqman primer for <i>M28.fcaA</i>                                                                                                                                                              |
| M28.109 TMP  | CTGGTGTGTAGGCACCTTGCTCCA                                                  | Taqman probe for <i>M28.fcaA</i>                                                                                                                                                               |
| TUFA TMF     | AACTACTTTAACAGTGCATCACAACT                                                | Taqman primer for <i>tufA</i>                                                                                                                                                                  |
| TUFA TMR     | AGAAGCGTAATCTTTTGGTTGGTT                                                  | Taqman primer for <i>tufA</i>                                                                                                                                                                  |
| TUFA TMP     | TATTTGGCACGTGCGCTTGCCCTCATC                                               | Taqman probe for <i>tufA</i>                                                                                                                                                                   |
| SKATM2 TMF   | CGGCTACTTTGAGGTCAATTGATT                                                  | Taqman primer for <i>M1.ska / M2.ska</i>                                                                                                                                                       |
| SKATM2 TMR   | CCGAACCTCTTTGTCAGCAA                                                      | Taqman primer for <i>M1.ska / M2.ska</i>                                                                                                                                                       |
| SKATM2 TMP   | CAAGCGATGCAACCACTACTGATTGCAAA                                             | Taqman probe for <i>M1.ska / M2.ska</i>                                                                                                                                                        |
| SKATM2 TMF   | CGGCTACTTTGAGGTCAATTGATT                                                  | Taqman primer for <i>M6.ska</i>                                                                                                                                                                |
| M6SKATMR     | CCGAATCATCTTTGTCAGCAA                                                     | Taqman primer for <i>M6.ska</i>                                                                                                                                                                |
| SKATM2 TMP   | CAAGCGATGCAACCACTACTGATTGCAAA                                             | Taqman probe for <i>M6.ska</i>                                                                                                                                                                 |
| SKATM2 TMF   | CGGCTACTTTGAGGTCAATTGATT                                                  | Taqman primer for <i>M28.ska</i>                                                                                                                                                               |
| M28SKATMR    | CCGAATCATCTCTGCTCAGCAA                                                    | Taqman primer for <i>M28.ska</i>                                                                                                                                                               |
| SKATM2 TMP   | CAAGCGATGCAACCACTACTGATTGCAAA                                             | Taqman probe for <i>M28.ska</i>                                                                                                                                                                |
| UNR218       | CTGActtaaacgactacatagAGAAAGGGAGATAAATGAAAAAGAAAC                          | Used with UNR219 to amplify the 5' end of gene 113 from M2 GAS and place it downstream of a T7 promoter for use in <i>in vitro</i> transcription                                               |
| UNR219       | ATTGGGATAGGATAGTAAAG                                                      | Used with UNR218 to amplify the 5' end of gene 113 from M2 GAS and place it downstream of a T7 promoter for use in <i>in vitro</i> transcription                                               |
| UNR123       | cttaaacgactacatagTAAATAAAGATTTACGAAGTC                                    | Used with FASEND9 to amplify <i>fasX</i> or the <i>fasX</i> derivative <i>fasX172-77</i> and allow their use in <i>in vitro</i> transcription assays by placing a T7 promoter upstream         |
| FASEND9      | aaaaaacggcaaacggcagct                                                     | Used with UNR123 to amplify <i>fasX</i> or the <i>fasX</i> derivative <i>fasX172-77</i> and allow their use in <i>in vitro</i> transcription assays by placing a T7 promoter upstream          |
| UNR291       | acgttaaacgactacatagGAGAGAAACAGTGGAGAGAGAAGATTAATAAC                       | Used in association with UNR292 to amplify the 5' UTR and initial coding region of <i>M6.tee6</i> and allow its use in <i>in vitro</i> transcription assays by placing a T7 promoter upstream  |
| UNR292       | GTGAGTATCATCTTTGATAAAGCTG                                                 | Used in association with UNR291 to amplify the 5' UTR and initial coding region of <i>M6.tee6</i> and allow its use in <i>in vitro</i> transcription assays by placing a T7 promoter upstream  |
| UNR212       | CTGActtaaacgactacatagGAGAGAGAGAGAAATGAAAAAATAAATTAATCTG                   | Used in association with UNR214 to amplify the 5' UTR and initial coding region of <i>M28.fcaA</i> and allow its use in <i>in vitro</i> transcription assays by placing a T7 promoter upstream |
| UNR214       | GATTTTACGTTTGTATTTAAAGAAG                                                 | Used in association with UNR212 to amplify the 5' UTR and initial coding region of <i>M28.fcaA</i> and allow its use in <i>in vitro</i> transcription assays by placing a T7 promoter upstream |
| UNR217       | ATATGAGTAAACTTGGTCTGACGctattatcatgctcttataatcTCTACCTTAACATGAGATAACTTTC    | Used in association with UNR218 to amplify the 5' UTR and first 158 codons of <i>M2.113</i> for use in <i>in vitro</i> transcription and translation reactions                                 |
| UNR218       | CTGActtaaacgactacatagAGAAAGGGAGATAAATGAAAAAGAAAC                          | Used in association with UNR217 to amplify the 5' UTR and first 158 codons of <i>M2.113</i> for use in <i>in vitro</i> transcription and translation reactions                                 |
| UNR291       | acgttaaacgactacatagGAGAGAAACAGTGGAGAGAGAAGATTAATAAC                       | Used in association with UNR293 to amplify the 5' UTR and first 158 codons of <i>M6.tee6</i> for use in <i>in vitro</i> transcription and translation reactions                                |
| UNR293       | ATATGAGTAAACTTGGTCTGACGctattatcatgctcttataatcTAATGATGATTTGCAACACTGTTTGTCC | Used in association with UNR292 to amplify the 5' UTR and first 158 codons of <i>M6.tee6</i> for use in <i>in vitro</i> transcription and translation reactions                                |
| UNR220       | ATATGAGTAAACTTGGTCTGACGctattatcatgctcttataatcTCCCTCAATACCACATTAACAAC      | Used in association with UNR356 to amplify the 5' UTR and first 158 codons of <i>M28.fcaA</i> for use in <i>in vitro</i> transcription and translation reactions                               |
| UNR356       | CTGActtaaacgactacatagGAAAAATCTCAACTTATTAAAGAGTG                           | Used in association with UNR220 to amplify the 5' UTR and first 158 codons of <i>M28.fcaA</i> for use in <i>in vitro</i> transcription and translation reactions                               |
| SPDTRN       | ATATGAGTAAACTTGGTCTGACGctattatcatgctcttataatcTCCGACATAAGATAGACACTTTAAAC   | Used in association with T7SPD to amplify the 5' UTR and first 158 codons of <i>spd</i> for use in <i>in vitro</i> transcription and translation reactions                                     |
| T7SPD        | cttaaacgactacatagGGTATGAGCGAAATAGAAAAAGG                                  | Used in association with SPDTRN to amplify the 5' UTR and first 158 codons of <i>spd</i> for use in <i>in vitro</i> transcription and translation reactions                                    |

Table S2  
Table of primers and probes used in this study.
